# Supplementary material
Source: publisher figshare collection journal article supplement (https://sage.figshare.com/ndownloader/files/18169085)

*Supplemental Figure 1. Full correlations of each metacarpal 2's dimension and age. (a) Width of Metacarpal 2 correlated by age. (b) Length of Metacarpal 2 correlated by age. (c) AB of Metacarpal 2 correlated by age. (d) AH of Metacarpal 2 correlated by age.*

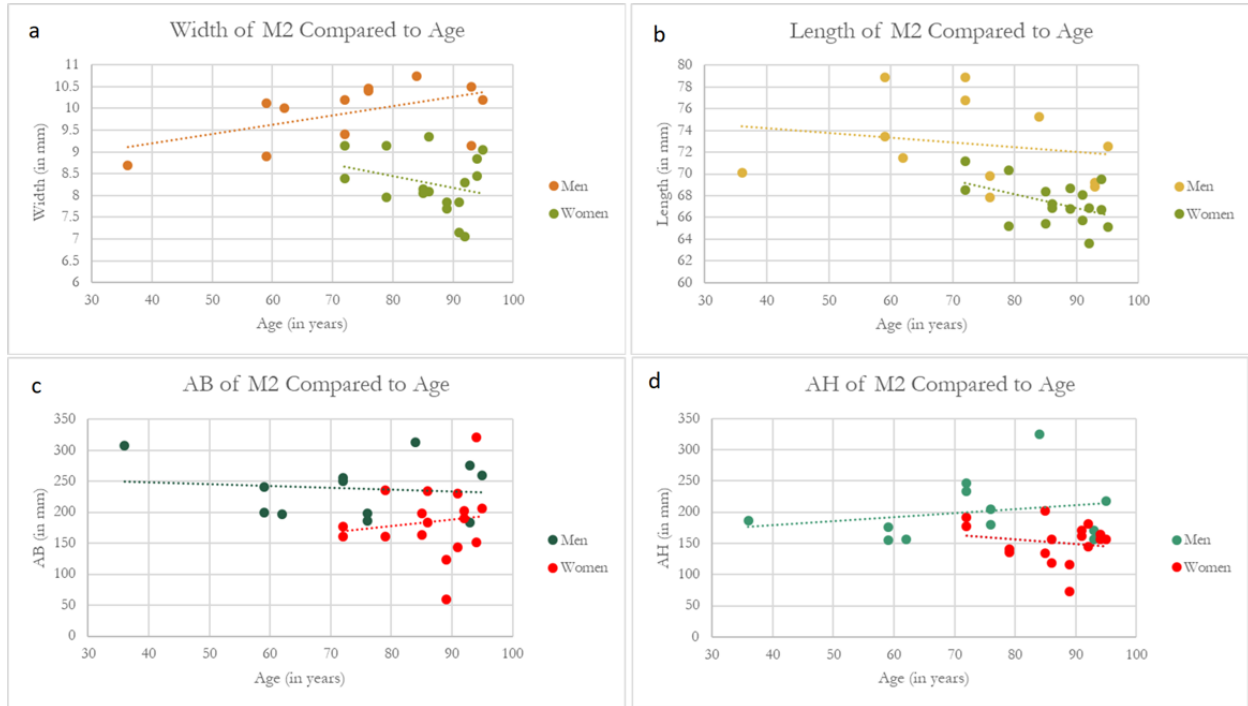

*Supplemental Figure 2. Full correlations of each metacarpal 3's dimension and age. (a) Width of Metacarpal 3 correlated by age. (b) Length of Metacarpal 3 correlated by age. (c) AB of Metacarpal 3 correlated by age. (d) AH of Metacarpal 3 correlated by age.*

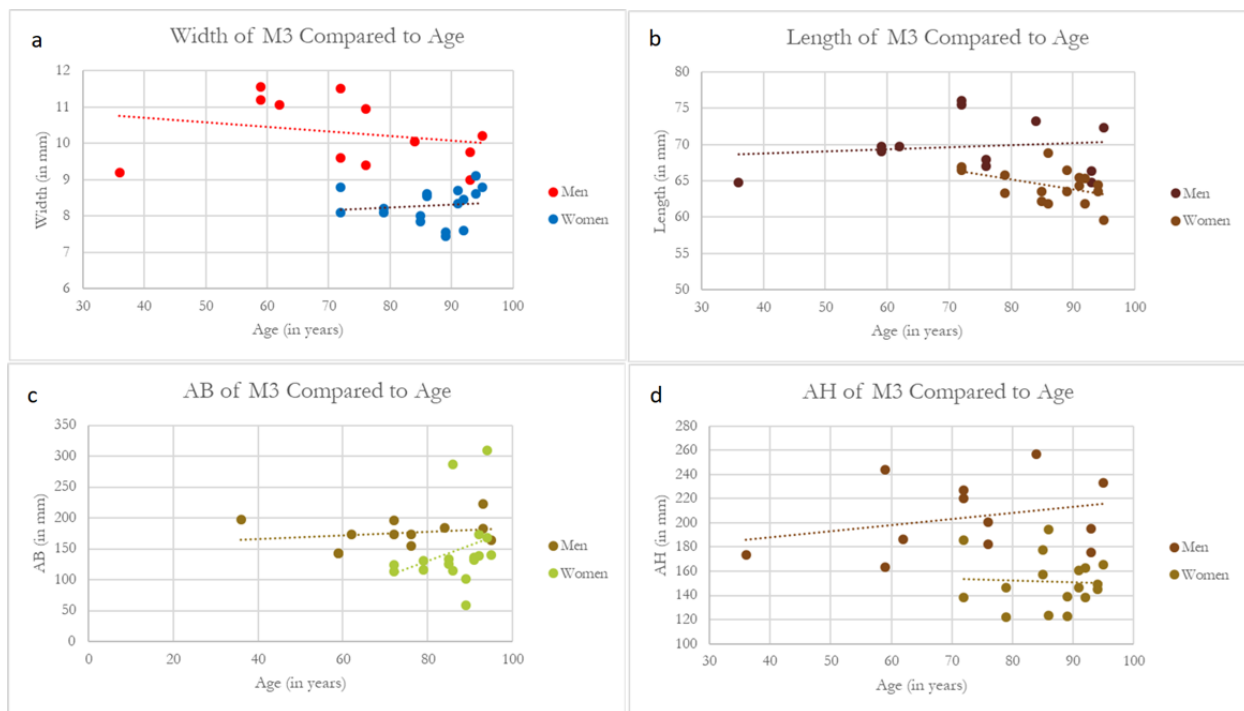

*Supplemental Figure 3. Full correlations of each metacarpal 4's dimension and age. (a) Width of Metacarpal 4 correlated by age. (b) Length of Metacarpal 4 correlated by age. (c) AB of Metacarpal 4 correlated by age. (d) AH of Metacarpal 4 correlated by age.*

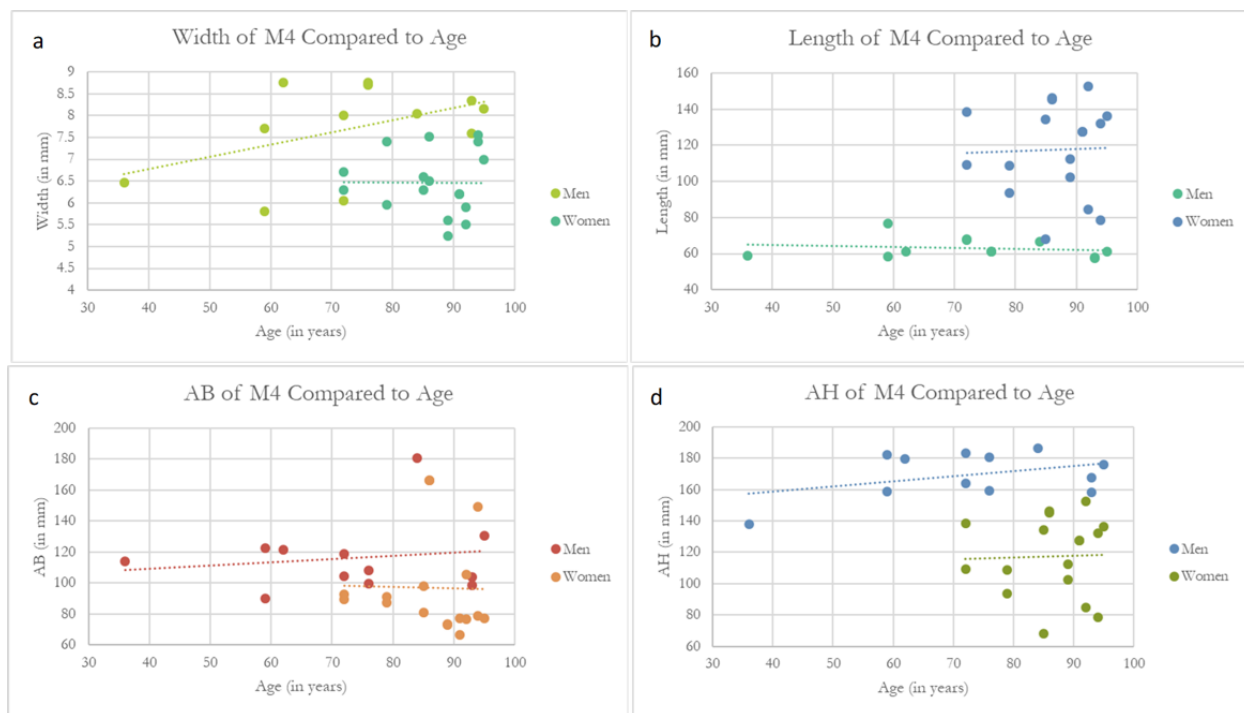

*Supplemental Figure 4. Full correlations of each metacarpal 5's dimension and age. (a) Width of Metacarpal 5 correlated by age. (b) Length of Metacarpal 5 correlated by age. (c) AB of Metacarpal 5 correlated by age. (d) AH of Metacarpal 5 correlated by age.*

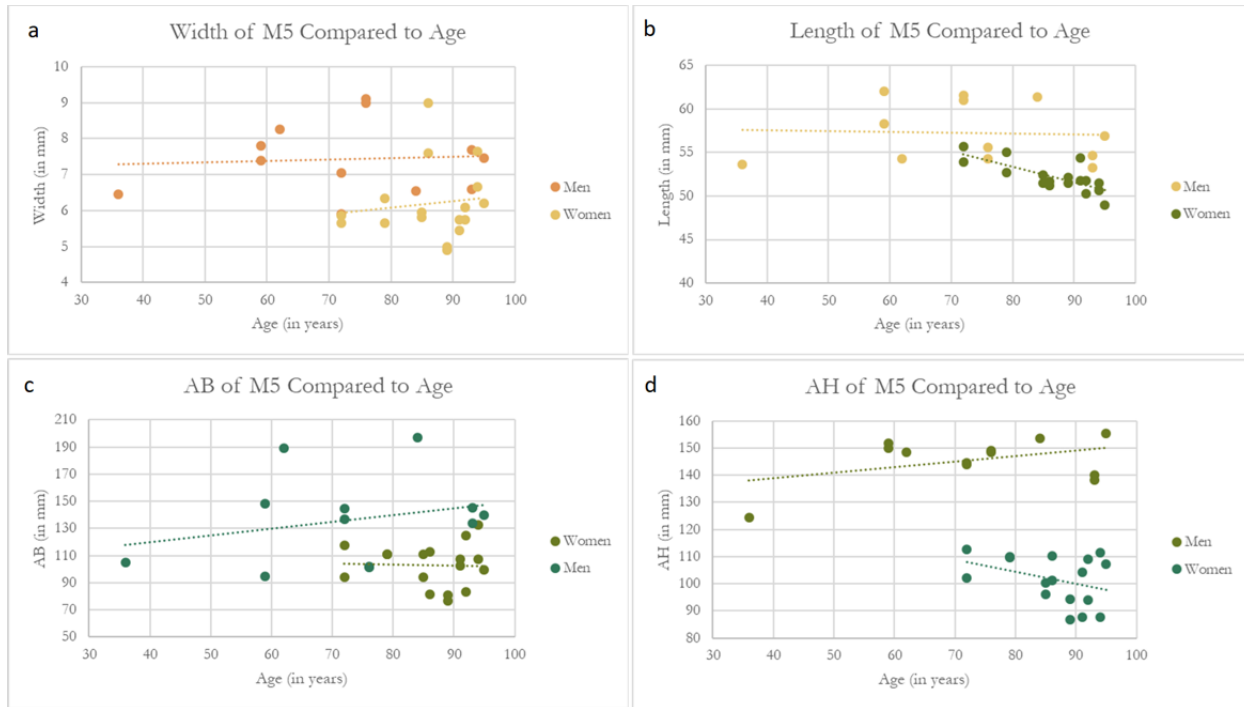

Supplement: Supplementary file 1 [file 18169085]
